# Supplementary material for: Peripheral nerve regeneration following scaffold-free conduit transplant of autologous dermal fibroblasts: a non-randomised safety and feasibility trial
Source: PubMed Central journal article supplement (PMC10817910; doi:10.1038/s43856-024-00438-6), 2024-01-26
Supplement: 43856_2024_438_MOESM2_ESM.pdf [file 43856_2024_438_MOESM2_ESM.pdf]

Supplementary Table 1. Study schedule

| Protocol: treatment and assessments         | Culture process             |                                            |         | Treatment                   |                                               |                        |                        | Observation                    |         |         |         |         |         |         |         |         |         |         |         |         |         |          |  | Discontinuation of transplantation | Discontinuation after transplantation |
|---------------------------------------------|-----------------------------|--------------------------------------------|---------|-----------------------------|-----------------------------------------------|------------------------|------------------------|--------------------------------|---------|---------|---------|---------|---------|---------|---------|---------|---------|---------|---------|---------|---------|----------|--|------------------------------------|---------------------------------------|
|                                             | Screening                   | Skin biopsy                                |         | 1 week after skin biopsy    | Pre-transplantation (hospitalization), day -1 | Transplantation, day 1 | Transplantation, day 2 | Discharge from hospital, day 4 | Week 1  | Week 4  | Week 8  | Week 12 | Week 16 | Week 20 | Week 24 | Week 28 | Week 32 | Week 36 | Week 40 | Week 44 | Week 48 |          |  |                                    |                                       |
|                                             |                             | pre                                        | post    |                             |                                               |                        |                        |                                |         |         |         |         |         |         |         |         |         |         |         |         |         |          |  |                                    |                                       |
| Permissible range                           | 30 days within registration | 30 days within confirmation of eligibility | ±4 days | 7 days within transplanting | 60 ± 21 days after skin biopsy                |                        |                        | ±4 days                        | ±7 days | ±7 days | ±7 days | ±7 days | ±7 days | ±7 days | ±7 days | ±7 days | ±7 days | ±7 days | ±7 days | ±7 days | ±7 days | ±28 days |  |                                    |                                       |
| Informed consent                            | X                           |                                            |         |                             |                                               |                        |                        |                                |         |         |         |         |         |         |         |         |         |         |         |         |         |          |  |                                    |                                       |
| Subject background                          | X                           |                                            |         |                             |                                               |                        |                        |                                |         |         |         |         |         |         |         |         |         |         |         |         |         |          |  |                                    |                                       |
| Interview, medical examination              | X                           | X                                          |         | X                           | X                                             | X                      | X                      | X                              | X       | X       | X       | X       | X       | X       | X       | X       | X       | X       | X       | X       | X       | X        |  |                                    |                                       |
| Present complains                           | X                           |                                            |         |                             |                                               |                        |                        |                                |         |         |         |         |         |         |         |         |         |         |         |         |         |          |  |                                    |                                       |
| Inclusion/exclusion criteria                | X                           |                                            |         |                             |                                               |                        |                        |                                |         |         |         |         |         |         |         |         |         |         |         |         |         |          |  |                                    |                                       |
| Medical history                             | X                           |                                            |         |                             |                                               |                        |                        |                                |         |         |         |         |         |         |         |         |         |         |         |         |         |          |  |                                    |                                       |
| Physical examination*1                      | X                           | X                                          | X       | X                           | X                                             | X                      | X                      | X                              |         |         |         |         |         |         |         |         |         |         |         |         |         |          |  |                                    |                                       |
| Subjective and objective symptoms           | X                           | X                                          | X       | X                           | X                                             | X                      | X                      | X                              | X       | X       | X       | X       | X       | X       | X       | X       | X       | X       | X       | X       | X       | X        |  |                                    |                                       |
| <b>Clinical tests</b>                       |                             |                                            |         |                             |                                               |                        |                        |                                |         |         |         |         |         |         |         |         |         |         |         |         |         |          |  |                                    |                                       |
| Haematologic test*2                         | X                           |                                            |         | X                           |                                               |                        |                        |                                |         |         |         |         |         |         |         |         |         |         |         |         |         |          |  |                                    |                                       |
| Haematologic biochemical test*3             | X                           |                                            |         | X                           |                                               |                        |                        |                                | X       | X       |         |         |         | X       |         |         |         |         |         |         | X       | X        |  |                                    |                                       |
| Coagulation test                            | X                           |                                            |         |                             |                                               |                        |                        |                                | X       | X       |         |         |         | X       |         |         |         |         |         |         | X       | X        |  |                                    |                                       |
| Infection analysis                          | X                           |                                            |         |                             |                                               |                        |                        |                                |         |         |         |         |         |         |         |         |         |         |         |         |         |          |  |                                    |                                       |
| Urine qualitative analysis                  | X                           |                                            |         |                             |                                               |                        |                        |                                |         |         |         |         |         |         |         |         |         |         |         |         |         |          |  |                                    |                                       |
| Chest X-ray                                 | X                           |                                            |         |                             |                                               |                        |                        |                                |         |         |         |         |         |         |         |         |         |         |         |         |         |          |  |                                    |                                       |
| Electrocardiography                         | X                           |                                            |         |                             |                                               |                        |                        |                                |         |         |         |         |         |         |         |         |         |         |         |         |         |          |  |                                    |                                       |
| <b>Nerve system and functional tests</b>    |                             |                                            |         |                             |                                               |                        |                        |                                |         |         |         |         |         |         |         |         |         |         |         |         |         |          |  |                                    |                                       |
| Sensory functional test (SWT)               | X                           |                                            |         |                             |                                               |                        |                        |                                | X       | X       |         |         |         | X       |         |         |         |         |         |         | X       | X        |  |                                    |                                       |
| Sensory functional test (s2PD, m2PD)        | X                           |                                            |         |                             |                                               |                        |                        |                                | X       | X       |         |         |         | X       |         |         |         |         |         |         | X       | X        |  |                                    |                                       |
| Assessment of upper limb impairment         | X                           |                                            |         |                             |                                               |                        |                        |                                | X       | X       |         |         |         | X       |         |         |         |         |         |         | X       | X        |  |                                    |                                       |
| Motor nerve function analysis (MMT)         | X**                         |                                            |         |                             |                                               |                        |                        |                                | X**     | X**     |         |         |         | X**     |         |         |         |         |         |         | X**     | X**      |  |                                    |                                       |
| Pregnancy test                              | X                           |                                            |         |                             |                                               |                        |                        |                                |         |         |         |         |         |         |         |         |         |         |         |         |         |          |  |                                    |                                       |
| Adverse event, failure                      |                             |                                            |         |                             |                                               |                        |                        |                                |         |         |         |         |         |         |         |         |         |         |         |         | X       | X        |  |                                    |                                       |
| Information regarding combination treatment |                             |                                            |         |                             |                                               |                        |                        |                                |         |         |         |         |         |         |         |         |         |         |         |         | X       | X        |  |                                    |                                       |

\*1: blood pressure, body weight, body temperature

\*2: RBC, WBC, PLT, HGB, HCT, Diff, screening: MCV, MCH, MCHC

\*3: TP, Alb, AST, ALT, ALP, T-Bil, Cr, BUN, CK, FBS, Na, K, Cl, Ca, CRP

\*\* : Conducted only for eligible individuals

SWT: Semmes-Weinstein monofilament test

s2PD: static 2-point discrimination test; m2PD: moving 2-point discrimination test; MMT: Manual Muscle Test

Abbreviations

RBC: Red Blood Cell; WBC: White Blood Cell; PLT: Platelet; HGB: Hemoglobin; HCT: Hematocrit; Diff: differential white blood count; MCV: Mean corpuscular volume; MCH: Mean corpuscular hemoglobin; MCHC: Mean corpuscular hemoglobin concentration.

TP: Total Protein; Alb: Albumin; AST: Aspartate aminotransferase; ALT: Alanine aminotransferase; ALP: Alkaline phosphatase; T-Bil: Total Bilirubin; Cr: Creatinine; BUN: Blood Urea Nitrogen; CK: Creatine Kinase; FBS: Fasting Blood Sugar (Glucose); Na: Sodium; K: Potassium; Cl: Chloride; Ca: Calcium; CRP: C-Reactive
