# Supplementary material for: Peripheral nerve regeneration following scaffold-free conduit transplant of autologous dermal fibroblasts: a non-randomised safety and feasibility trial
Source: PubMed Central journal article supplement (PMC10817910; doi:10.1038/s43856-024-00438-6), 2024-01-26
Supplement: 43856_2024_438_MOESM3_ESM.pdf [file 43856_2024_438_MOESM3_ESM.pdf]

1 **Description of Additional Supplementary Files**

2

3 **File Name:** Supplementary Data 1

4 **Description:** Clinical results shown in Figure 3

5
