# Supplementary material for: Peripheral nerve regeneration following scaffold-free conduit transplant of autologous dermal fibroblasts: a non-randomised safety and feasibility trial
Source: PubMed Central journal article supplement (PMC10817910; doi:10.1038/s43856-024-00438-6), 2024-01-26
Supplement: 43856_2024_438_MOESM4_ESM.pdf [file 43856_2024_438_MOESM4_ESM.pdf]

Source data 1. Clinical results

SWMT

|              | B3CON01 | B3CON02 | B3CON03 | average | stdev |
|--------------|---------|---------|---------|---------|-------|
| pre TX       | 6.65    | 6.65    | 6.65    | 6.65    | 0.00  |
| 4W after TX  | 6.65    | 4.31    | 5.46    | 5.47    | 0.96  |
| 12W after TX | 6.65    | 4.08    | 3.61    | 4.78    | 1.34  |
| 24W after TX | 4.56    | 3.61    | 3.22    | 3.80    | 0.56  |
| 36W after TX | 4.17    | 3.61    | 2.44    | 3.41    | 0.72  |
| 48W after TX | 4.08    | 2.44    | 2.44    | 2.99    | 0.77  |

s2PD

|              | B3CON01 | B3CON02 | B3CON03 | average | stdev |
|--------------|---------|---------|---------|---------|-------|
| pre TX       | 20      | 20      | 20      | 20.0    | 0.0   |
| 4W after TX  | 20      | 15      | 20      | 18.3    | 2.4   |
| 12W after TX | 20      | 9       | 10      | 13.0    | 5.0   |
| 24W after TX | 20      | 5       | 6       | 10.3    | 6.8   |
| 36W after TX | 15      | 3       | 4       | 7.3     | 5.4   |
| 48W after TX | 10      | 3       | 4       | 5.7     | 3.1   |

m2PD

|              | B3CON01 | B3CON02 | B3CON03 | average | stdev |
|--------------|---------|---------|---------|---------|-------|
| pre TX       | 20      | 20      | 20      | 20.0    | 0.0   |
| 4W after TX  | 20      | 15      | 20      | 18.3    | 2.4   |
| 12W after TX | 20      | 7       | 7       | 11.3    | 6.1   |
| 24W after TX | 20      | 3       | 4       | 9.0     | 7.8   |
| 36W after TX | 15      | 2       | 3       | 6.7     | 5.9   |
| 48W after TX | 10      | 2       | 3       | 5.0     | 3.6   |

qDASH

|              | B3CON01 | B3CON02 | B3CON03 | average | stdev |
|--------------|---------|---------|---------|---------|-------|
| pre TX       | 84.1    | 54.5    | 95.5    | 78.0    | 17.3  |
| 4W after TX  | 84.1    | 4.5     | 72.7    | 53.8    | 35.1  |
| 12W after TX | 75      | 4.5     | 38.6    | 39.4    | 28.8  |
| 24W after TX | 59.1    | 4.5     | 27.3    | 30.3    | 22.4  |
| 36W after TX | 68.2    | 2.3     | 25      | 31.8    | 27.3  |
| 48W after TX | 63.6    | 0       | 27.3    | 30.3    | 26.1  |
